# Supplementary material for: Use of Poly(vinyl alcohol)-Malic Acid (CLHPMA) Hydrogels and Chitosan Coated Calcium Alginate (CCCA) Microparticles as Potential Sorbent Phases for the Extraction and Quantitative Determination of Pesticides from Aqueous Solutions
Source: MDPI journal article supplement (doi:10.3390/polym13223993), 2021-11-19
Supplement: s1 [file s1]

[illegible]

**Table S1.** Assay to describe and optimize the capture and desorption of selected compounds by CLPHMA with ultrasonic agitation, at 20 °C. Numbers in parentheses correspond to the coded values of the variables under study (ND: Not Detected).

| Exp | Capture time [min] | Desorption time [min] | CLPHMA Composition [%] | pH of desorption solution [-] | mg/L of compound released per mg of CLPHMA |        |        |        |        |
|-----|--------------------|-----------------------|------------------------|-------------------------------|--------------------------------------------|--------|--------|--------|--------|
|     |                    |                       |                        |                               | CFN                                        | KCF    | DMT    | MTD    | MTL    |
| 1   | 120 (1)            | 60 (-1)               | 30 (1)                 | 3 (-1)                        | ND                                         | 0.0007 | 0.0010 | ND     | ND     |
| 2   | 10 (-1)            | 120 (1)               | 10 (-1)                | 9 (1)                         | 0.0008                                     | ND     | 0.0011 | 0.0025 | ND     |
| 3   | 120 (1)            | 60 (-1)               | 30 (1)                 | 3 (-1)                        | 0.0008                                     | ND     | ND     | 0.0016 | ND     |
| 4   | 120 (1)            | 60 (-1)               | 30 (1)                 | 3 (-1)                        | 0.0012                                     | ND     | ND     | 0.0048 | ND     |
| 5   | 120 (1)            | 120 (1)               | 30 (1)                 | 9 (1)                         | ND                                         | 0.0008 | ND     | 0.0015 | 0.0003 |
| 6   | 10 (-1)            | 60 (-1)               | 10 (-1)                | 3 (-1)                        | ND                                         | ND     | ND     | ND     | 0.0003 |
| 7   | 120 (1)            | 120 (1)               | 30 (1)                 | 9 (1)                         | 0.0008                                     | ND     | 0.0014 | ND     | ND     |
| 8   | 10 (-1)            | 120 (1)               | 10 (-1)                | 9 (1)                         | 0.0008                                     | ND     | ND     | ND     | ND     |
| 9   | 10 (-1)            | 120 (1)               | 10 (-1)                | 9 (1)                         | 0.0028                                     | ND     | ND     | 0.0073 | ND     |
| 10  | 10 (-1)            | 120 (1)               | 10 (-1)                | 9 (1)                         | ND                                         | ND     | ND     | ND     | 0.0004 |
| 11  | 120 (1)            | 60 (-1)               | 30 (1)                 | 3 (-1)                        | ND                                         | 0.0007 | ND     | ND     | ND     |
| 12  | 120 (1)            | 120 (1)               | 30 (1)                 | 9 (1)                         | 0.0007                                     | 0.0008 | ND     | ND     | ND     |
| 13  | 10 (-1)            | 60 (-1)               | 10 (-1)                | 3 (-1)                        | 0.0005                                     | ND     | ND     | ND     | ND     |
| 14  | 10 (-1)            | 60 (-1)               | 10 (-1)                | 3 (-1)                        | 0.0008                                     | ND     | ND     | 0.0014 | ND     |
| 15  | 10 (-1)            | 60 (-1)               | 10 (-1)                | 3 (-1)                        | 0.0011                                     | ND     | ND     | 0.0023 | ND     |
| 16  | 120 (1)            | 120 (1)               | 30 (1)                 | 9 (1)                         | 0.0008                                     | ND     | ND     | 0.0043 | 0.0005 |
| 17  | 10 (-1)            | 90 (0)                | 10 (-1)                | 7.3 (0.43)                    | 0.0005                                     | ND     | ND     | 0.0014 | ND     |
| 18  | 65 (0)             | 90 (0)                | 20 (0)                 | 7.3 (0.43)                    | ND                                         | ND     | ND     | 0.0015 | ND     |
| 19  | 120 (1)            | 60 (-1)               | 30 (1)                 | 7.3 (0.43)                    | 0.0005                                     | ND     | ND     | ND     | ND     |
| 20  | 10 (-1)            | 60 (-1)               | 20 (0)                 | 7.3 (0.43)                    | ND                                         | ND     | 0.0013 | 0.0021 | ND     |
| 21  | 65 (0)             | 120 (1)               | 30 (1)                 | 7.3 (0.43)                    | 0.0006                                     | ND     | ND     | 0.0019 | ND     |
| 22  | 120 (1)            | 120 (1)               | 10 (-1)                | 7.3 (0.43)                    | 0.0006                                     | ND     | ND     | 0.0013 | 0.0004 |

**Table S2.** Assay to describe and optimize the capture and desorption of selected compounds by CCCA microparticles with ultrasonic agitation at 20 °C. Numbers in parentheses correspond to the coded values of the variables under study (ND: Not Detected).

| Exp | Capture time [min] | Desorption time [min] | CCCA Composition [%] | pH of desorption solution [-] | mg/L of compound released per mg of CCCA |        |        |        |        |
|-----|--------------------|-----------------------|----------------------|-------------------------------|------------------------------------------|--------|--------|--------|--------|
|     |                    |                       |                      |                               | CFN                                      | KCF    | DMT    | MTD    | MTL    |
| 1   | 120 (1)            | 60 (-1)               | 56.5 (1)             | 3 (-1)                        | 0.0022                                   | 0.0018 | ND     | 0.0050 | ND     |
| 2   | 10 (-1)            | 120 (1)               | 47.3 (-1)            | 9 (1)                         | 0.0022                                   | 0.0032 | 0.0015 | 0.0048 | ND     |
| 3   | 120 (1)            | 60 (-1)               | 56.5 (1)             | 3 (-1)                        | 0.0025                                   | 0.0025 | ND     | 0.0040 | 0.0035 |
| 4   | 120 (1)            | 60 (-1)               | 56.5 (1)             | 3 (-1)                        | 0.0022                                   | 0.0023 | 0.0023 | 0.0041 | 0.0027 |
| 5   | 120 (1)            | 120 (1)               | 56.5 (1)             | 9 (1)                         | 0.0020                                   | 0.0017 | ND     | 0.0048 | 0.0017 |
| 6   | 10 (-1)            | 60 (-1)               | 47.3 (-1)            | 3 (-1)                        | 0.0014                                   | 0.0017 | 0.0010 | 0.0035 | 0.0014 |
| 7   | 120 (1)            | 120 (1)               | 56.5 (1)             | 9 (1)                         | 0.0015                                   | 0.0014 | ND     | 0.0025 | 0.0016 |
| 8   | 10 (-1)            | 120 (1)               | 47.3 (-1)            | 9 (1)                         | 0.0020                                   | 0.0014 | 0.0036 | 0.0015 | 0.0009 |
| 9   | 10 (-1)            | 120 (1)               | 47.3 (-1)            | 9 (1)                         | 0.0014                                   | 0.0014 | 0.0010 | 0.0031 | 0.0003 |
| 10  | 10 (-1)            | 120 (1)               | 47.3 (-1)            | 9 (1)                         | 0.0021                                   | 0.0024 | ND     | 0.0024 | 0.0035 |

|    |         |         |             |            |        |        |        |        |        |
|----|---------|---------|-------------|------------|--------|--------|--------|--------|--------|
| 11 | 120 (1) | 60 (-1) | 56.5 (1)    | 3 (-1)     | 0.0022 | 0.0026 | 0.0020 | 0.0047 | 0.0016 |
| 12 | 120 (1) | 120 (1) | 56.5 (1)    | 9 (1)      | 0.0026 | 0.0028 | 0.0023 | 0.0035 | 0.0033 |
| 13 | 10 (-1) | 60 (-1) | 47.3 (-1)   | 3 (-1)     | 0.0021 | 0.0022 | 0.0010 | 0.0023 | 0.0034 |
| 14 | 10 (-1) | 60 (-1) | 47.3 (-1)   | 3 (-1)     | 0.0031 | 0.0015 | ND     | 0.0070 | 0.0028 |
| 15 | 10 (-1) | 60 (-1) | 47.3 (-1)   | 3 (-1)     | 0.0018 | 0.0018 | ND     | 0.0036 | 0.0011 |
| 16 | 120 (1) | 120 (1) | 56.5 (1)    | 9 (1)      | 0.0020 | 0.0018 | ND     | 0.0018 | ND     |
| 17 | 10 (-1) | 90 (0)  | 47.3 (-1)   | 7.3 (0.43) | 0.0014 | 0.0010 | ND     | 0.0015 | 0.0009 |
| 18 | 65 (0)  | 90 (0)  | 52.4 (0.11) | 7.3 (0.43) | 0.0017 | 0.0013 | 0.0045 | 0.0043 | 0.0014 |
| 19 | 120 (1) | 60 (-1) | 56.5 (1)    | 7.3 (0.43) | 0.0017 | 0.0017 | 0.0022 | 0.0038 | 0.0013 |
| 20 | 10 (-1) | 60 (-1) | 52.4 (0.11) | 7.3 (0.43) | 0.0028 | 0.0018 | 0.0032 | 0.0075 | 0.0009 |
| 21 | 65 (0)  | 120 (1) | 56.5 (1)    | 7.3 (0.43) | 0.0019 | 0.0017 | 0.0009 | 0.0029 | 0.0025 |
| 22 | 120 (1) | 120 (1) | 47.3 (-1)   | 7.3 (0.43) | 0.0013 | 0.0011 | 0.0010 | 0.0049 | 0.0008 |

**Table S3.** Summary of the multifactorial multiple regression analysis for the analytes under study and their experimental variables, using CLPHMA, and ultrasonic agitation for extraction (Where A: capture time; B: desorption time; C: hydrogel composition; and D: pH of desorption solution) (NSS: Not Statistically Significant at the 95.0% or higher confidence level).

| Analyte | Influence                                                                             |   |   |                    | ANOVA model P-Value |
|---------|---------------------------------------------------------------------------------------|---|---|--------------------|---------------------|
|         | A                                                                                     | B | C | D                  |                     |
| CFN     | - (NSS)                                                                               | + | - | -                  | 0.7761              |
|         | Equation of the fitted model                                                          |   |   | R <sup>2</sup> (%) |                     |
|         | CFN = 0.000611706 + 0.000196307*B - 0.00010894*C - 0.0000678702*D                     |   |   | 9.43               |                     |
|         |                                                                                       |   |   |                    |                     |
| KCF     | +                                                                                     | + | + | - (NSS)            | 0.2370              |
|         | Equation of the fitted model                                                          |   |   | R <sup>2</sup> (%) |                     |
|         | KCF = 0.000135804 + 0.0000723359*A + 0.0000239794*B + 0.0000883222*C - 0.0000258484*D |   |   | 26.52              |                     |
|         |                                                                                       |   |   |                    |                     |
| DMT     | - (NSS)                                                                               | - | + | +                  | 0.6275              |
|         | Equation of the fitted model                                                          |   |   | R <sup>2</sup> (%) |                     |
|         | DMT = 0.000204789 - 0.000243478*B + 0.000142168*C + 0.000337866*D                     |   |   | 13.46              |                     |
|         |                                                                                       |   |   |                    |                     |
| MTD     | -                                                                                     | + | + | - (NSS)            | 0.9349              |
|         | Equation of the fitted model                                                          |   |   | R <sup>2</sup> (%) |                     |
|         | MTD = 0.00153501 - 0.000459895*A + 0.000502623*B + 0.000315214*C                      |   |   | 4.49               |                     |
|         |                                                                                       |   |   |                    |                     |
| MTL     | +                                                                                     | + | - | + (NSS)            | 0.2689              |
|         | Equation of the fitted model                                                          |   |   | R <sup>2</sup> (%) |                     |
|         | MTL = 0.0000821354 + 0.000109214*A + 0.0000403219*B - 0.000105851*C                   |   |   | 25.09              |                     |
|         |                                                                                       |   |   |                    |                     |

**Table S4.** Summary of the multifactorial multiple regression analysis for the analytes under study and their experimental variables, using CCCA, and ultrasonic agitation for extraction (Where A: capture time; B: desorption time; C: hydrogel composition; and D: pH of desorption solution) (NSS: Not Statistically Significant at the 95.0% or higher confidence level).

| Analyte | Influence                                                         |         |   |                    | ANOVA<br>model<br>P-Value |
|---------|-------------------------------------------------------------------|---------|---|--------------------|---------------------------|
|         | A                                                                 | B       | C | D                  |                           |
| CFN     | -                                                                 | -       | + | +                  | 0.3405                    |
|         | Equation of the fitted model                                      |         |   | R <sup>2</sup> (%) |                           |
|         | CFN = 0.00198997 - 0.000256563*A - 0.000147483*B + 0.000314512*C  |         |   | 22.25              |                           |
|         | -                                                                 | - (NSS) | + | -                  |                           |
| KCF     | Equation of the fitted model                                      |         |   | R <sup>2</sup> (%) | 0.8633                    |
|         | KCF = 0.00185338 - 0.000141217*A + 0.000242778*C - 0.0000269197*D |         |   | 6.92               |                           |
|         | -                                                                 | -       | + | +                  |                           |
|         | Equation of the fitted model                                      |         |   | R <sup>2</sup> (%) |                           |
| DMT     | DMT = 0.0011691 - 0.000117156*A - 0.000907593*B + 0.00106634*D    |         |   | 11.42              | 0.7030                    |
|         | -                                                                 | -       | + | +                  |                           |
|         | Equation of the fitted model                                      |         |   | R <sup>2</sup> (%) |                           |
|         | DMT = 0.0011691 - 0.000117156*A - 0.000907593*B + 0.00106634*D    |         |   | 11.42              |                           |
| MTD     | +                                                                 | -       | - | +                  | 0.4441                    |
|         | Equation of the fitted model                                      |         |   | R <sup>2</sup> (%) |                           |
|         | MTD = 0.00378317 + 0.000222548*A - 0.00101861*B + 0.00042502*D    |         |   | 18.75              |                           |
|         | - (NSS)                                                           | +       | + | -                  |                           |
| MTL     | Equation of the fitted model                                      |         |   | R <sup>2</sup> (%) | 0.6669                    |
|         | MTL = 0.00163456 + 0.000560102*B + 0.000518706*C - 0.000895016*D  |         |   | 12.39              |                           |
|         | - (NSS)                                                           | +       | + | -                  |                           |
|         | Equation of the fitted model                                      |         |   | R <sup>2</sup> (%) |                           |
